# Supplementary material for: Effect of different clay minerals and calcination temperature on the morphology and color of clay/CoAl2O4 hybrid pigments
Source: Royal Society of Chemistry journal article supplement (doi:10.1039/c5ra19955g), 2015-01-01
Supplement: c5ra19955g1.pdf [file c5ra19955g1.pdf]

# **Clay/CoAl<sub>2</sub>O<sub>4</sub> hybrid pigments: Effect of different clay minerals and calcination temperature on the morphology and color**

Bin Mu <sup>a,b</sup>, Qin Wang <sup>a,b</sup>, Aiqin Wang <sup>a,b\*</sup>

<sup>a</sup> Center of Eco-material and Green Chemistry, Lanzhou Institute of Chemical Physics, Chinese Academy of Sciences, Lanzhou 730000, People's Republic of China

<sup>b</sup> Center of Xuyi Attapulgate Applied Technology, Lanzhou Institute of Chemical Physics, Chinese Academy of Sciences, Xuyi 211700, P.R. China

---

\* Corresponding author. Tel.: +86 931 4968118; fax: +86 931 8277088.  
*E-mail:* aqwang@licp.cas.cn (A. Wang).

**Table S1** The composition of three clays determined by X-ray fluorescence

| Composition<br>Clay | Al <sub>2</sub> O <sub>3</sub> | MgO    | CaO   | SiO <sub>2</sub> | K <sub>2</sub> O | Fe <sub>2</sub> O <sub>3</sub> |
|---------------------|--------------------------------|--------|-------|------------------|------------------|--------------------------------|
| APT                 | 10.47%                         | 20.41% | 1.29% | 64.31%           | 0.13%            | 0.87%                          |
| I-S                 | 18.27%                         | 1.87%  | 0.23% | 65.93%           | 3.15%            | 3.53%                          |
| MMT                 | 17.14%                         | 3.87%  | 0.46% | 68.62%           | 1.62%            | 1.48%                          |

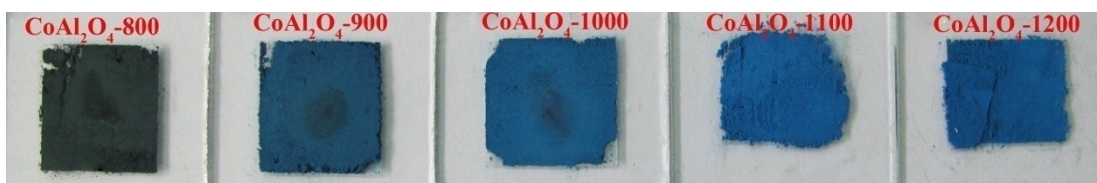

**Fig. S1** Digital photographs of CoAl<sub>2</sub>O<sub>4</sub> pigment: CoAl<sub>2</sub>O<sub>4</sub>-800, CoAl<sub>2</sub>O<sub>4</sub>-900, CoAl<sub>2</sub>O<sub>4</sub>-1000, CoAl<sub>2</sub>O<sub>4</sub>-1100, and CoAl<sub>2</sub>O<sub>4</sub>-1200.

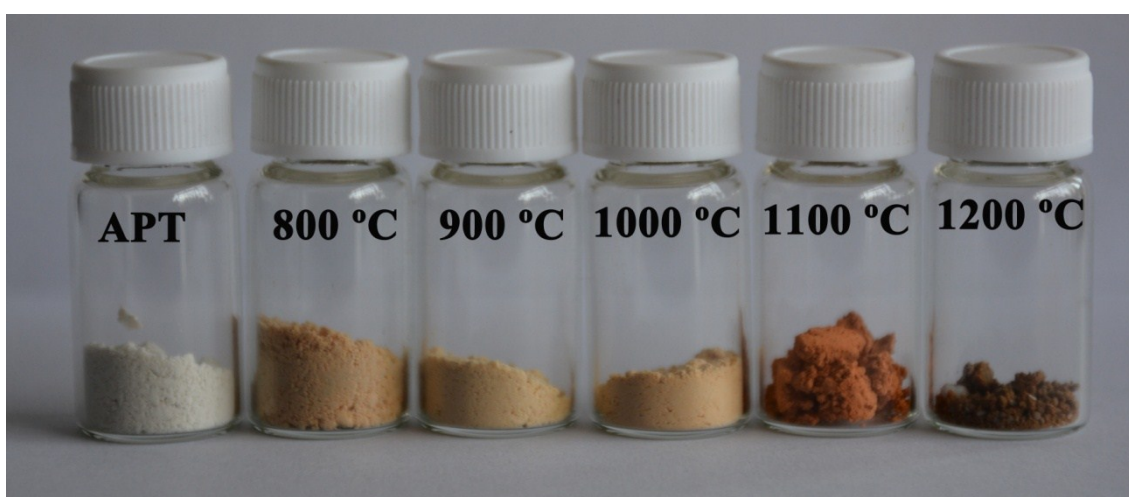

**Fig. S2** Digital photographs of the natural APT and the calcined APT at different temperatures.

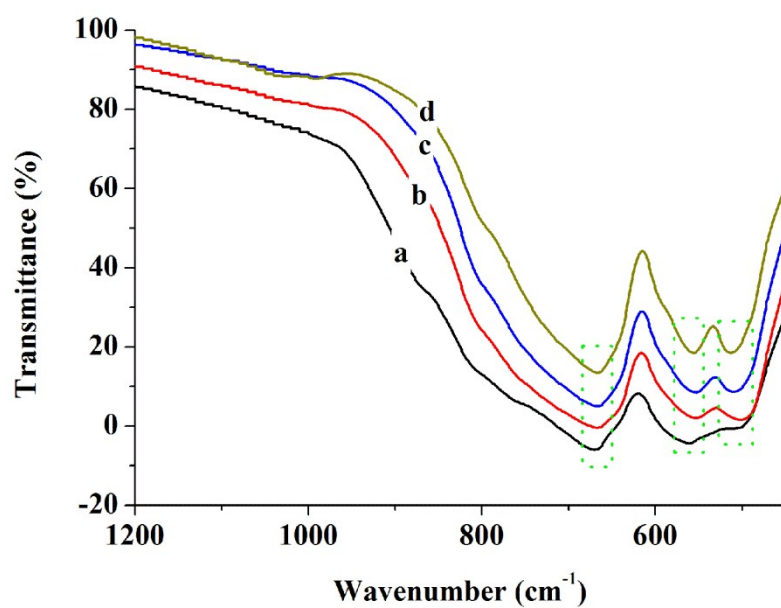

**Fig. S3** FTIR spectra of a) CoAl<sub>2</sub>O<sub>4</sub>-800, b) CoAl<sub>2</sub>O<sub>4</sub>-900, c) CoAl<sub>2</sub>O<sub>4</sub>-1000, and d) CoAl<sub>2</sub>O<sub>4</sub>-1200.

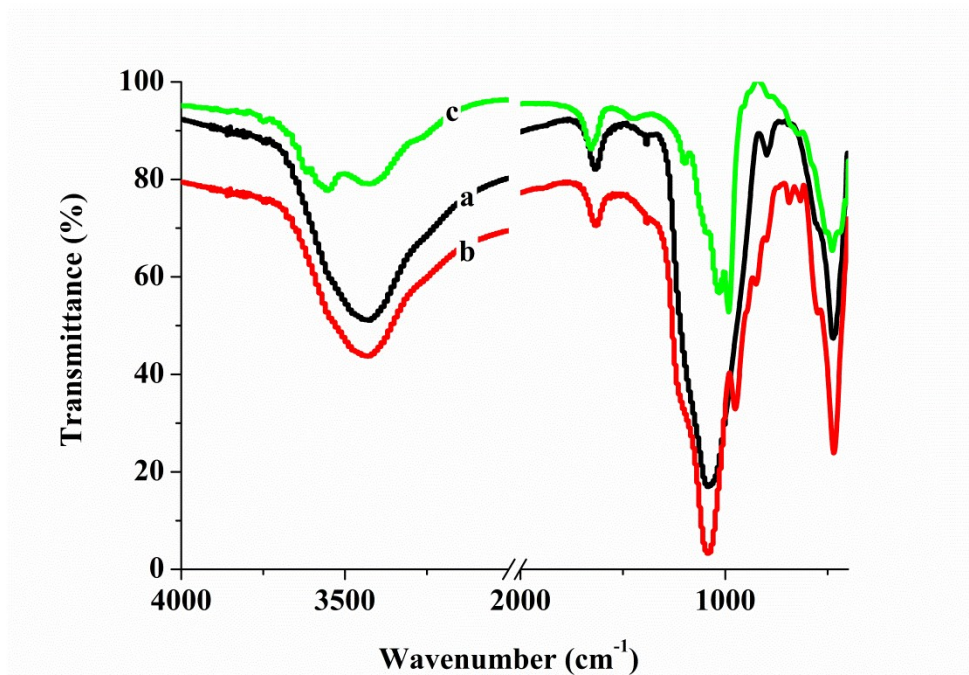

**Fig. S4** FTIR spectra of a) the natural APT and the calcined APT at 800 °C (b) and 1000 °C (c).

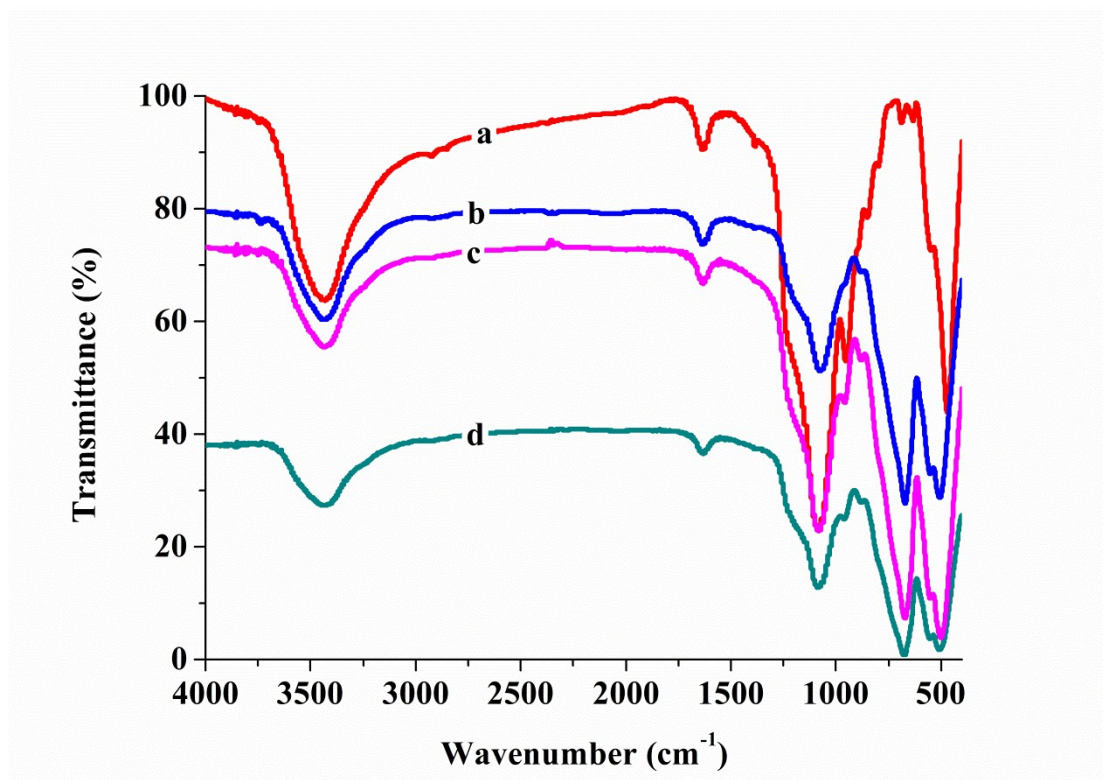

**Fig. S5** FTIR spectra of a) the calcined APT at 1000 °C, b) APT/CoAl<sub>2</sub>O<sub>4</sub>-1-1000, c) APT/CoAl<sub>2</sub>O<sub>4</sub>-2-1000, and d) APT/CoAl<sub>2</sub>O<sub>4</sub>-3-1000.

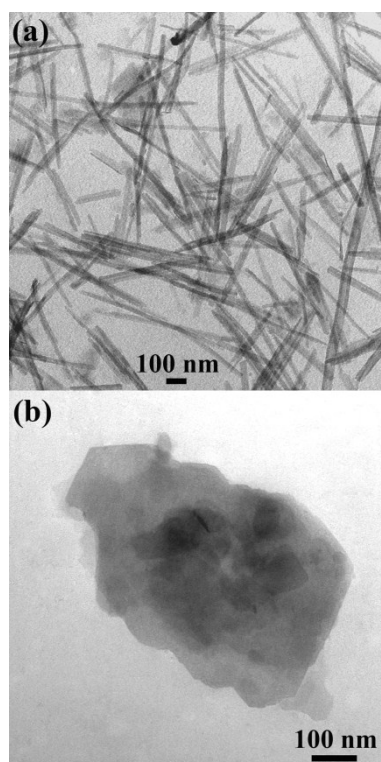

**Fig. S6** TEM images of (a) the natural APT and (b) the natural I-S.

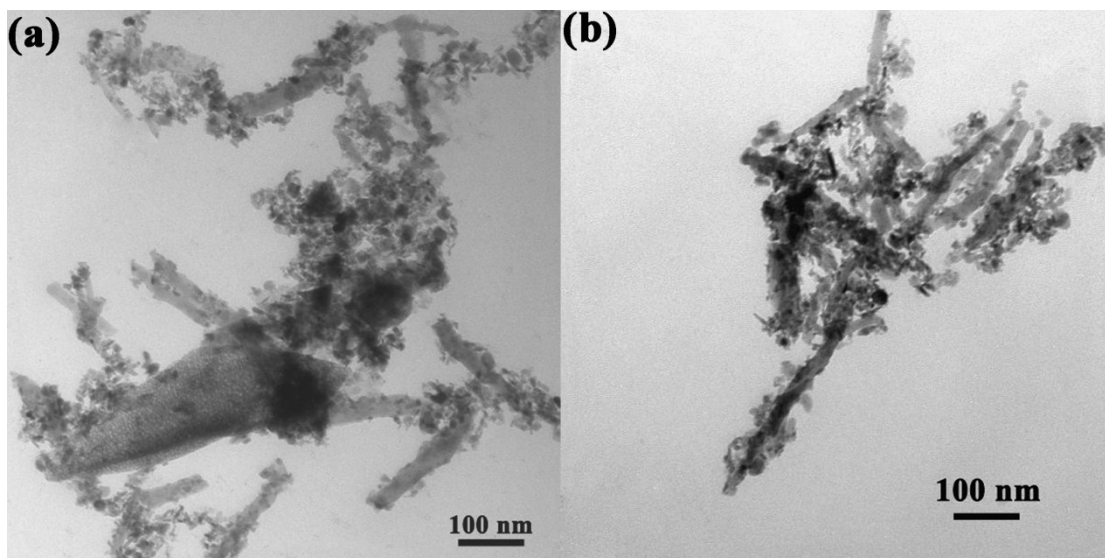

Fig. S7 TEM images of (a) APT/CoAl<sub>2</sub>O<sub>4</sub>-1-800 and (b) APT/CoAl<sub>2</sub>O<sub>4</sub>-3-800.

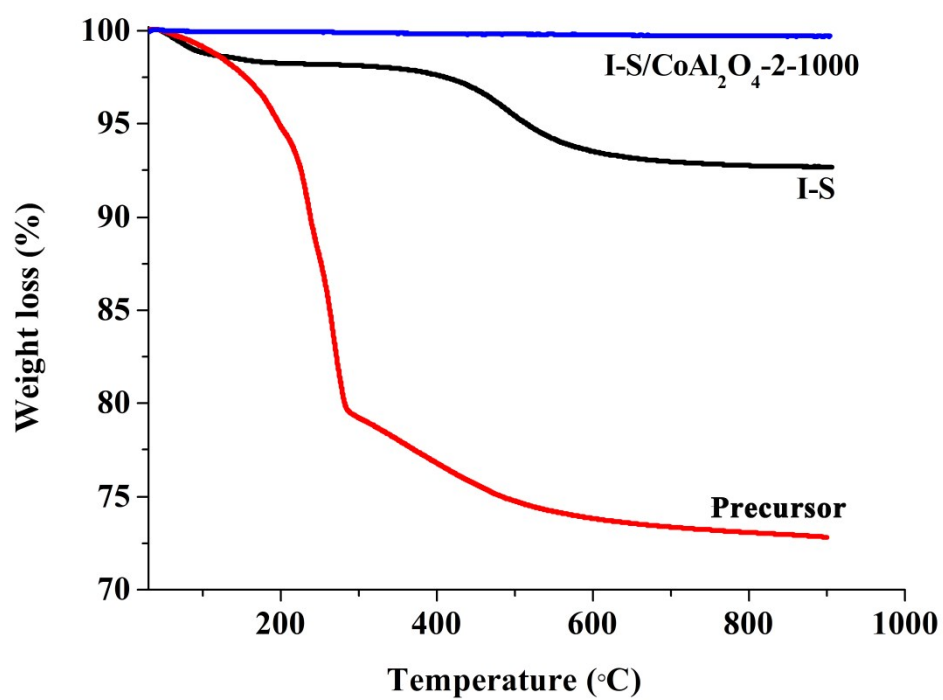

Fig. S8 TGA curves of the natural I-S, the precursor, and I-S/CoAl<sub>2</sub>O<sub>4</sub>-1000.



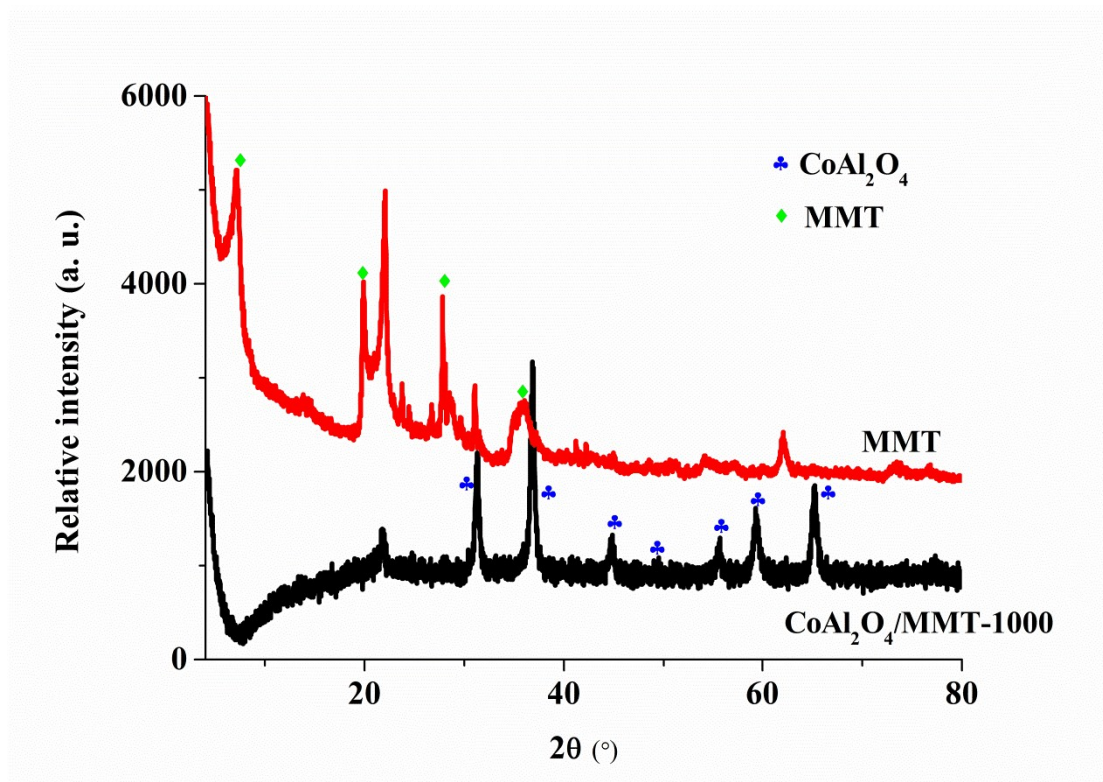

Fig. S9 XRD patterns of the natural MMT and MMT/CoAl<sub>2</sub>O<sub>4</sub>-1000.

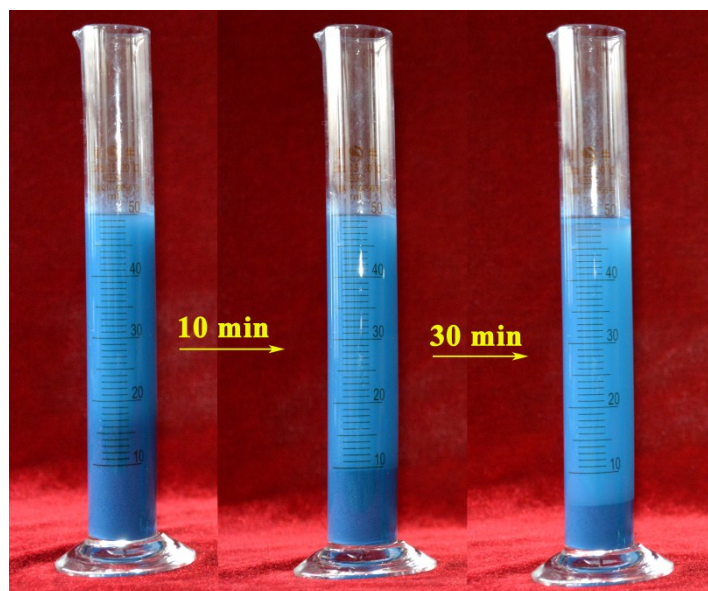

Fig. S10 Digital photographs of the suspension of CoAl<sub>2</sub>O<sub>4</sub>-1000

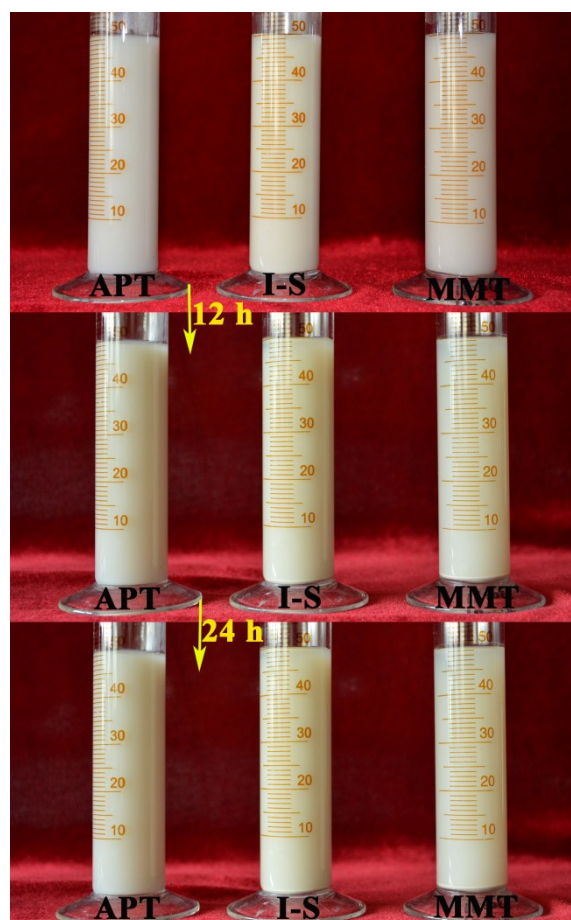

**Fig. S11** Digital photographs of the suspension of the used three clays
